# Supplementary material for: Electrical and electrochemical properties of graphene modulated through surface functionalization
Source: Royal Society of Chemistry journal article supplement (doi:10.1039/c5ra26533a), 2016-01-01
Supplement: c5ra26533a1.pdf [file c5ra26533a1.pdf]

Supporting Information

**Electrical and Electrochemical Properties of Graphene Modulated through  
Surface Functionalization**

*Rini Jain and Satyendra Mishra\**,

University Institute of Chemical Technology, North Maharashtra University

**Table of content:**

- Figure S1: a) FESEM image of GO<sub>1</sub> and (b & c) elemental mapping of Carbon (Red dots) and Oxygen (Green dots)
- Figure S2: Energy dispersive spectra (EDX) of GO<sub>1</sub>
- Figure S3: a) FESEM image of GO<sub>2</sub> and (b & c) elemental mapping of Carbon (Red dots) and Oxygen (Green dots)
- Figure S4: Energy dispersive spectra (EDX) of GO<sub>2</sub>
- Figure S5: a) FESEM image of GO<sub>3</sub> and (b & c) elemental mapping of Carbon (Red dots) and Oxygen (Green dots)
- Figure S6: Energy dispersive spectra (EDX) of GO<sub>3</sub>
- Figure S7: FESEM image of RGO and (b & c) elemental mapping of Carbon (Red dots) and Oxygen (Green dots)
- Figure S8: Energy dispersive spectra (EDX) of RGO
- Figure S9: FESEM image of RSGO and (b & c) elemental mapping of Carbon (Red dots) and Oxygen (Green dots)
- Figure S10: Energy dispersive spectra (EDX) of RSGO
- Figure S 11: a) FESEM image of RGO<sub>1</sub> and (b & c) elemental mapping of Carbon (Red dots) and Oxygen (Green dots)
- Figure S12: Energy dispersive spectra (EDX) of RGO<sub>1</sub>
- Figure S 13: a) FESEM image of RGO<sub>2</sub> and (b & c) elemental mapping of Carbon (Red dots) and Oxygen (Green dots)
- Figure S14: Energy dispersive spectra (EDX) of RGO<sub>2</sub>
- Figure S15: a) FESEM image of RGO<sub>3</sub> and (b & c) elemental mapping of Carbon (Red dots) and Oxygen (Green dots)
- Figure S16: Energy dispersive spectra (EDX) of RGO<sub>3</sub>

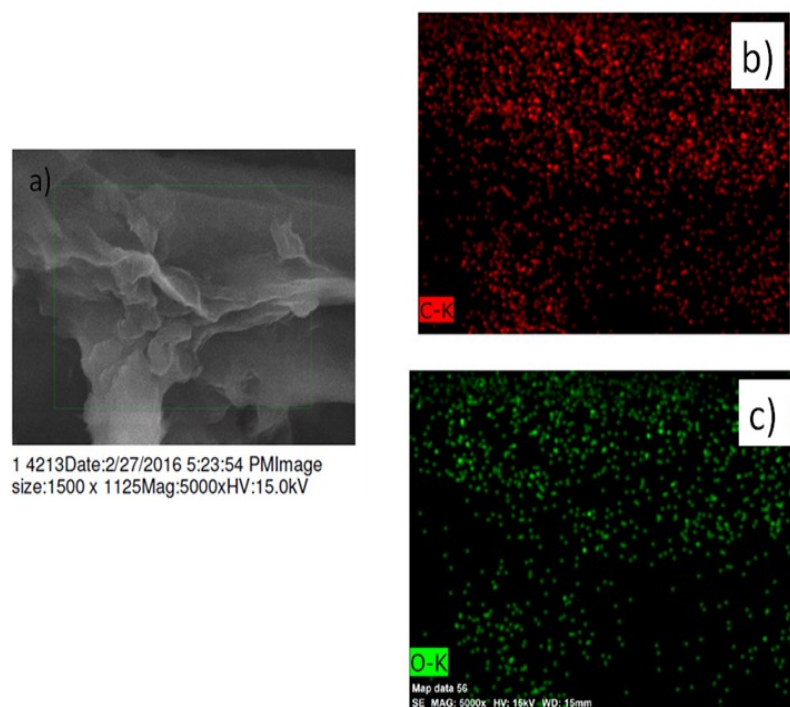

Figure 1: a) FESEM image of GO<sub>1</sub> and (b & c) elemental mapping of Carbon (Red dots) and Oxygen (Green dots)

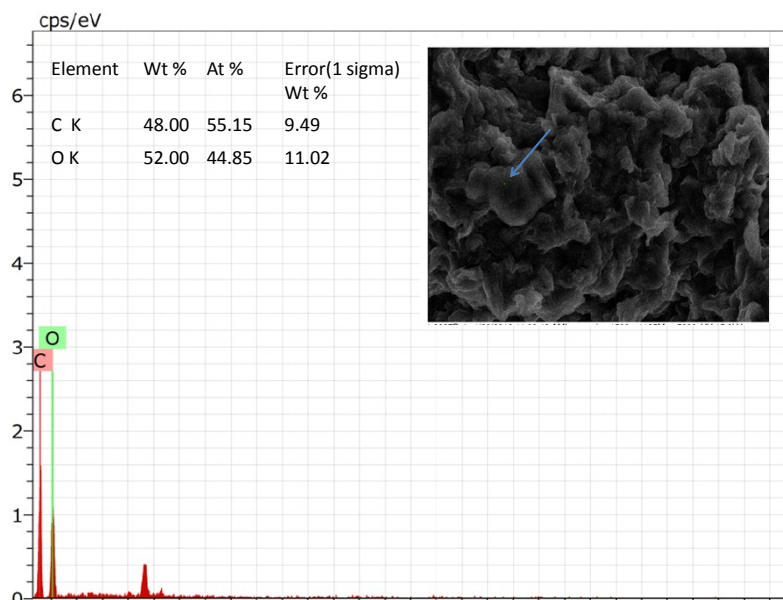

Figure 2: Energy dispersive spectra (EDX) of GO<sub>1</sub>

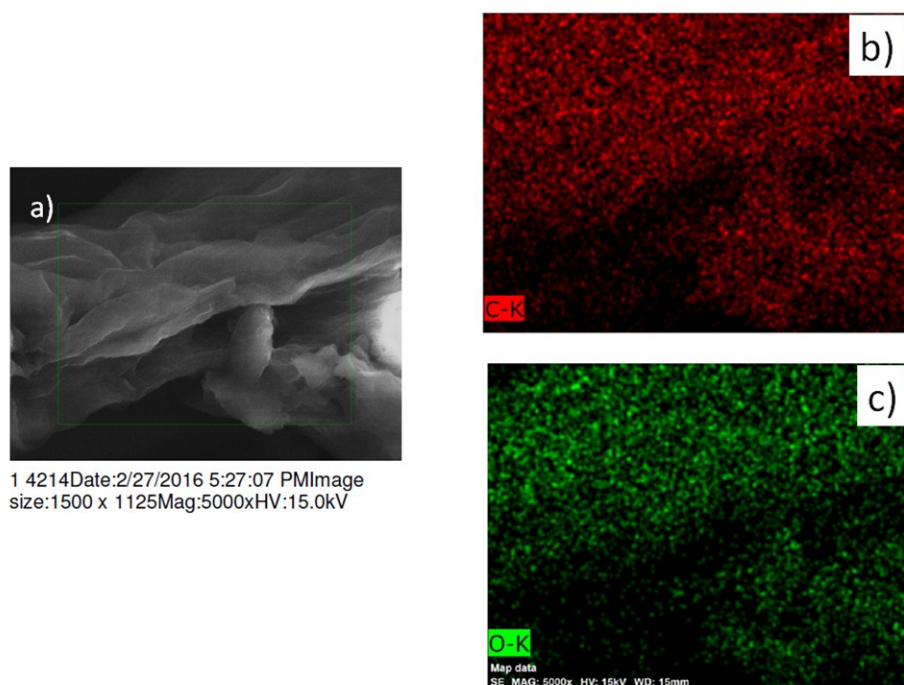

Figure 3: a) FESEM image of GO<sub>2</sub> and (b & c) elemental mapping of Carbon (Red dots) and Oxygen (Green dots)

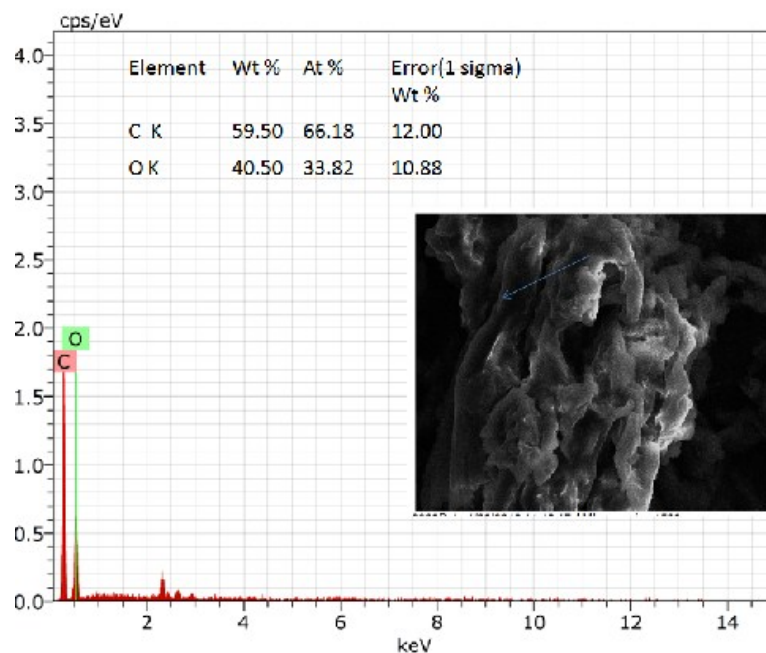

Figure 4: Energy dispersive spectra (EDX) of  $\text{GO}_2$

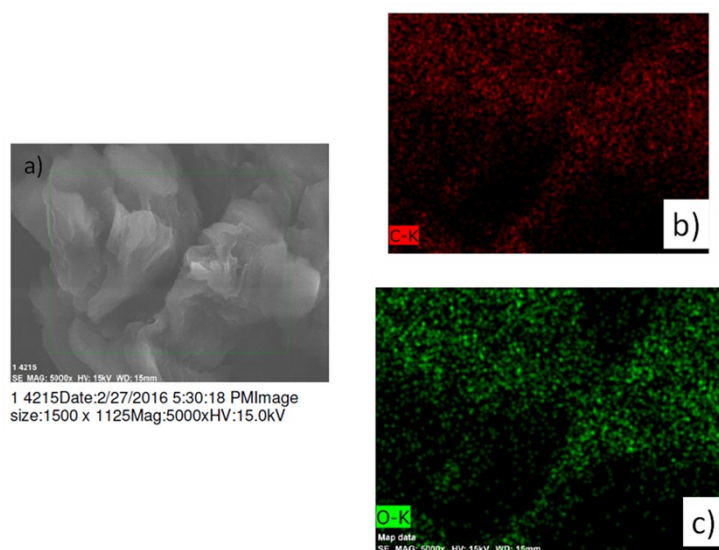

Figure 5: a) FESEM image of  $\text{GO}_3$  and (b & c) elemental mapping of Carbon (Red dots) and Oxygen (Green dots)

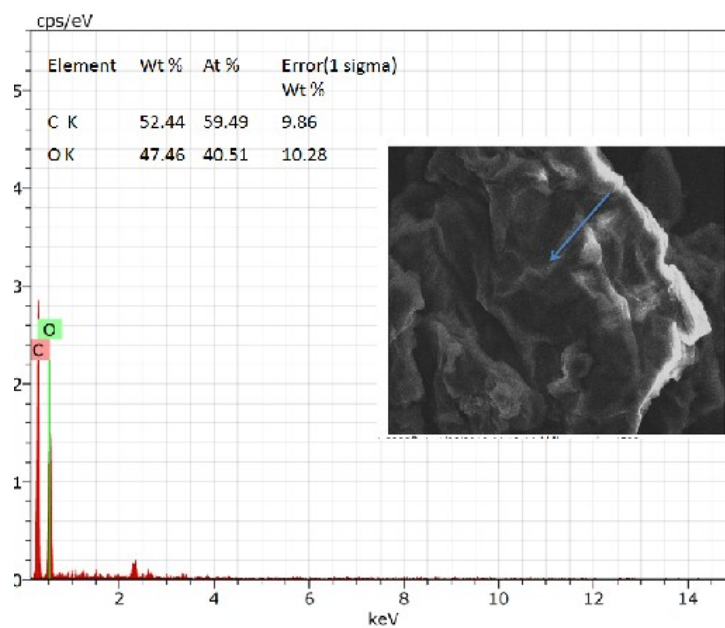

Figure 6: Energy dispersive spectra (EDX) of  $\text{GO}_3$

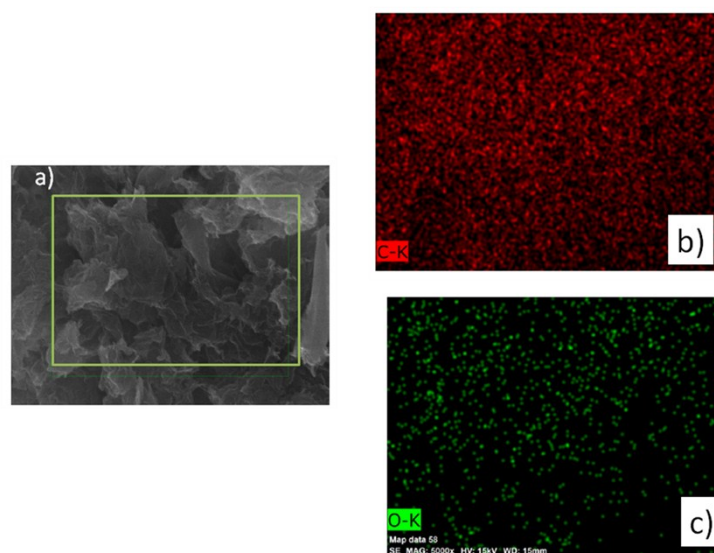

Figure 7: a) FESEM image of RGO and (b & c) elemental mapping of Carbon (Red dots) and Oxygen (Green dots)

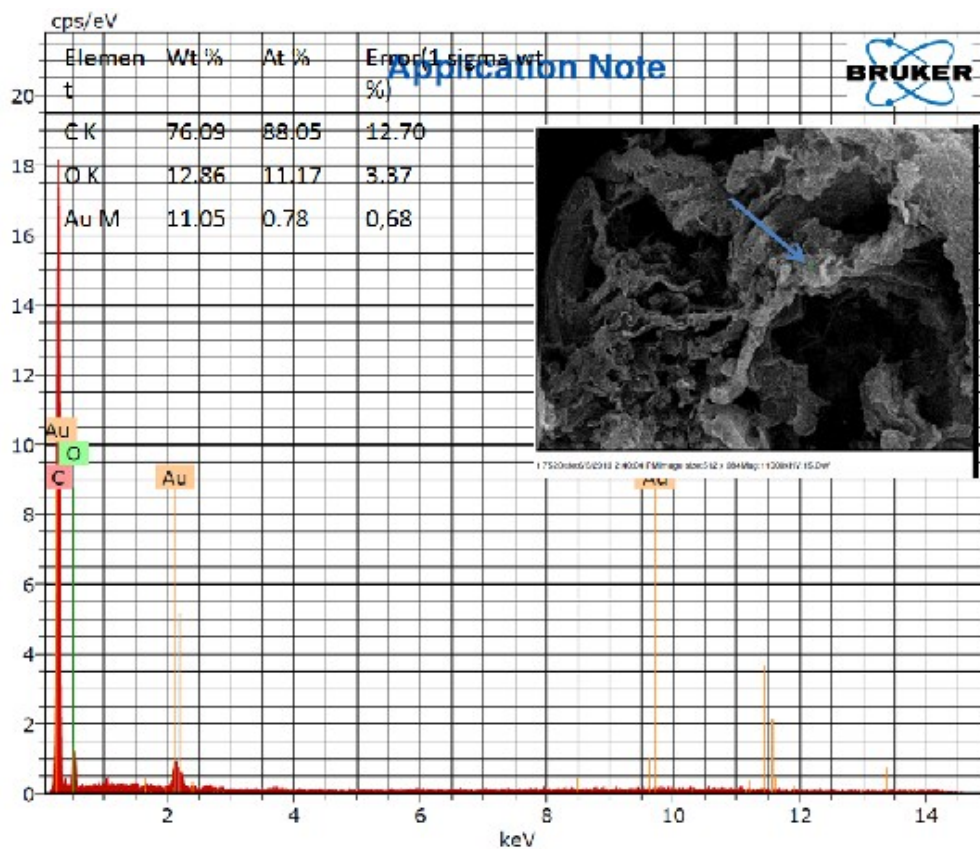

Figure 8: Energy dispersive spectra (EDX) of RGO

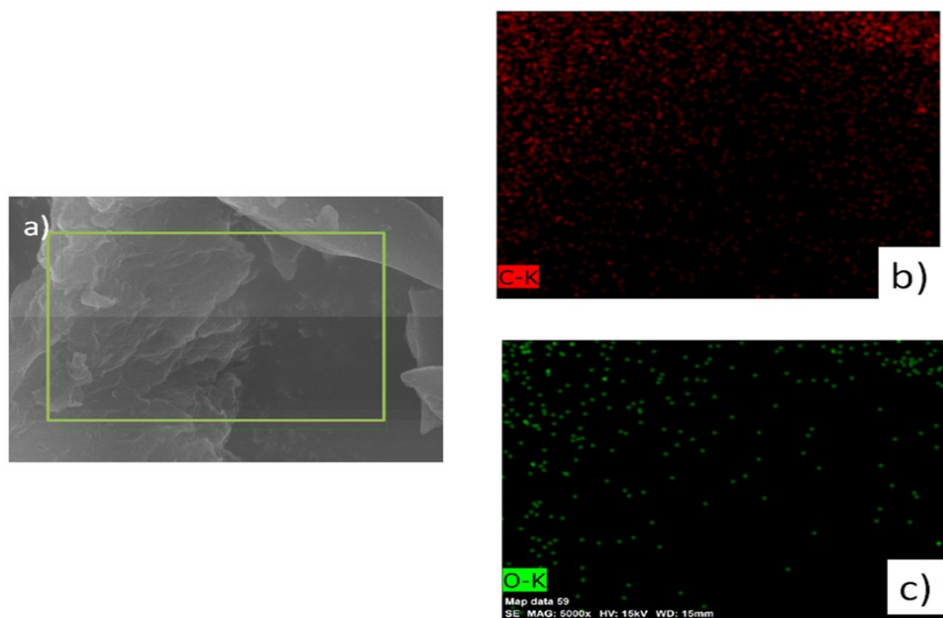

Figure 9: a) FESEM image of RSGO and (b & c) elemental mapping of Carbon (Red dots) and Oxygen (Green dots)



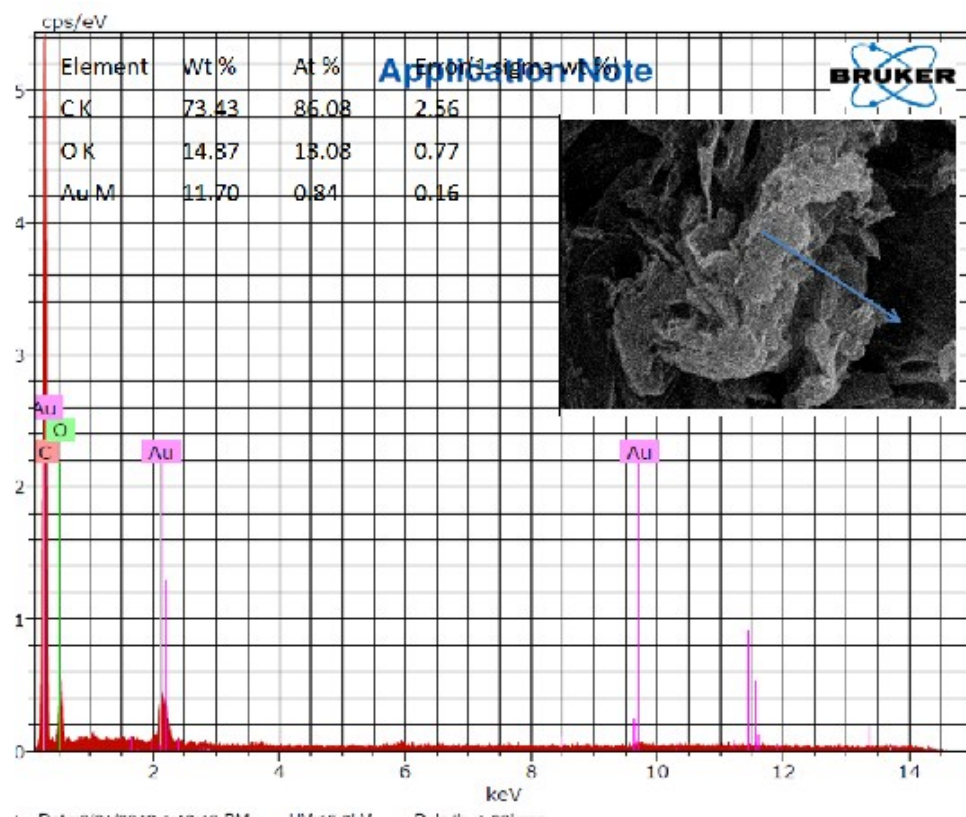

Figure 10: Energy dispersive spectra (EDX) of RSGO

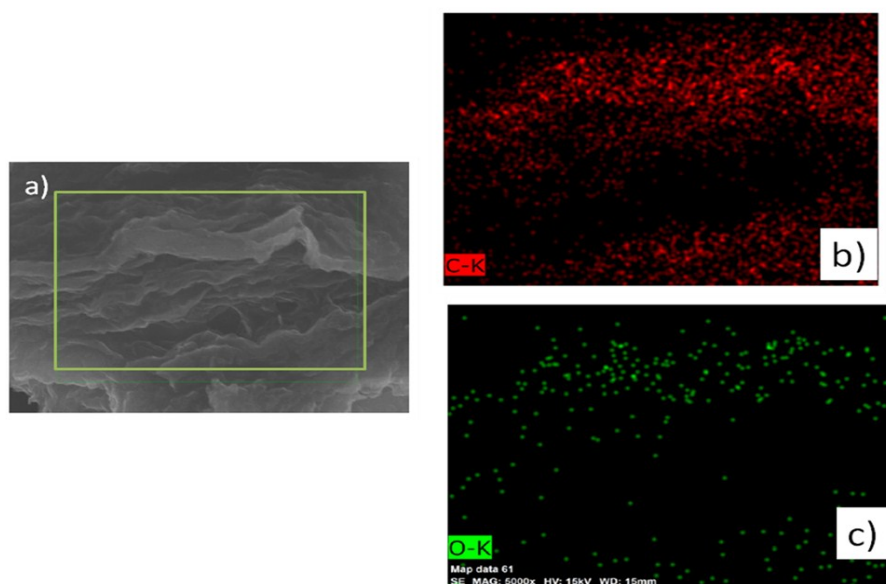

Figure 11: a) FESEM image of RGO<sub>1</sub> and (b & c) elemental mapping of Carbon (Red dots) and Oxygen (Green dots)

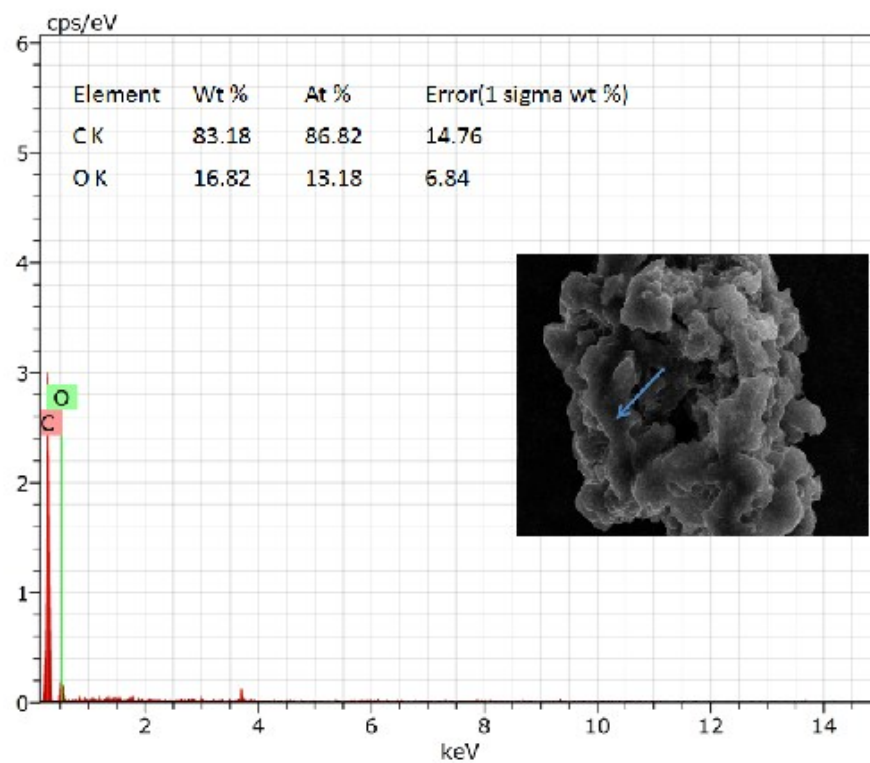

Figure 12: Energy dispersive spectra (EDX) of RGO<sub>1</sub>

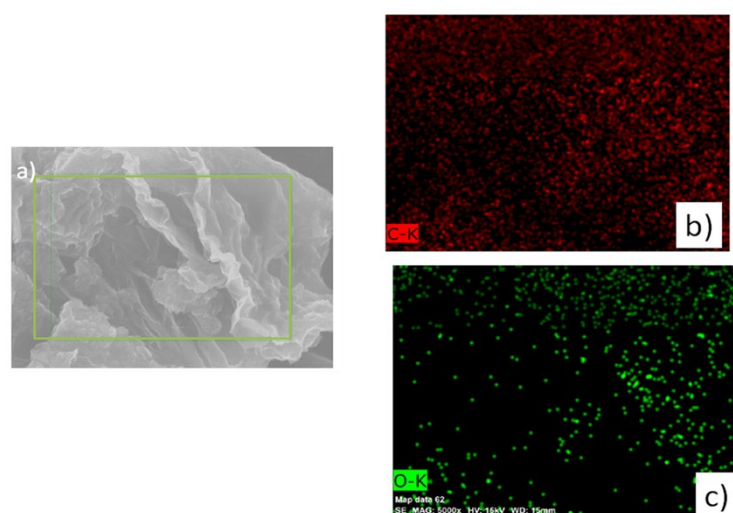

Figure 13: a) FESEM image of RGO<sub>2</sub> and (b & c) elemental mapping of Carbon (Red dots) and Oxygen (Green dots)



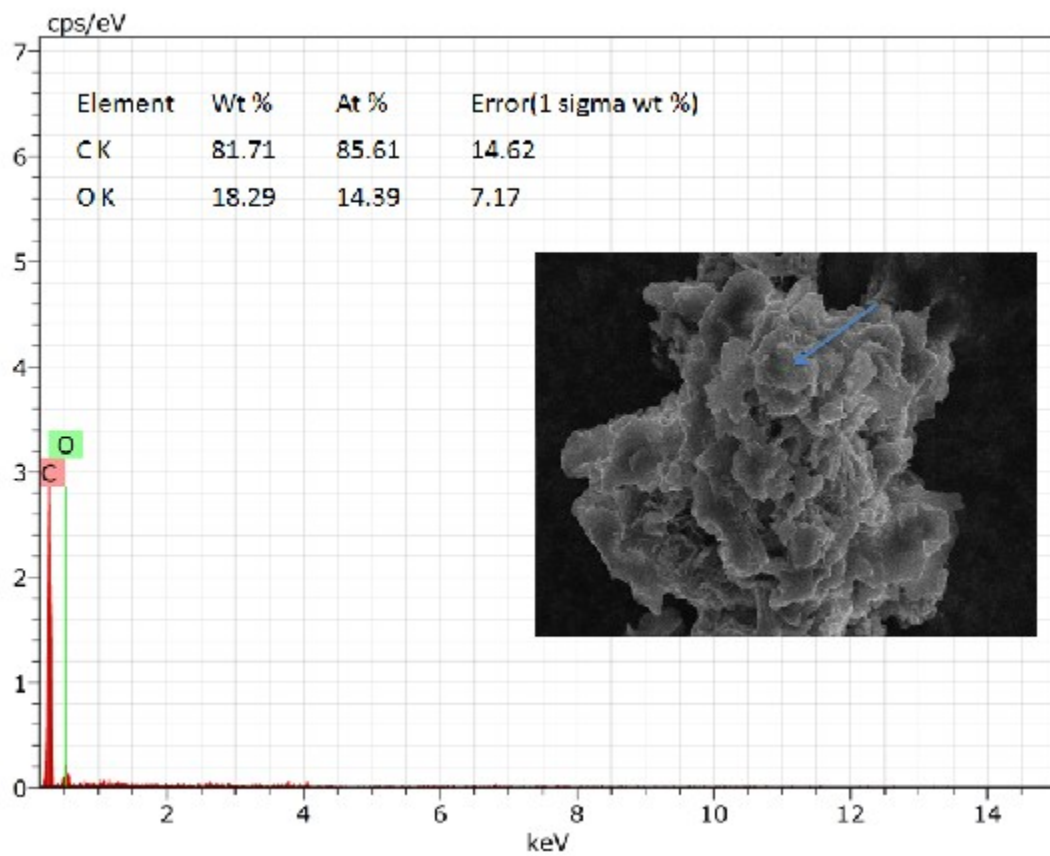

Figure 14: Energy dispersive spectra (EDX) of RGO<sub>2</sub>

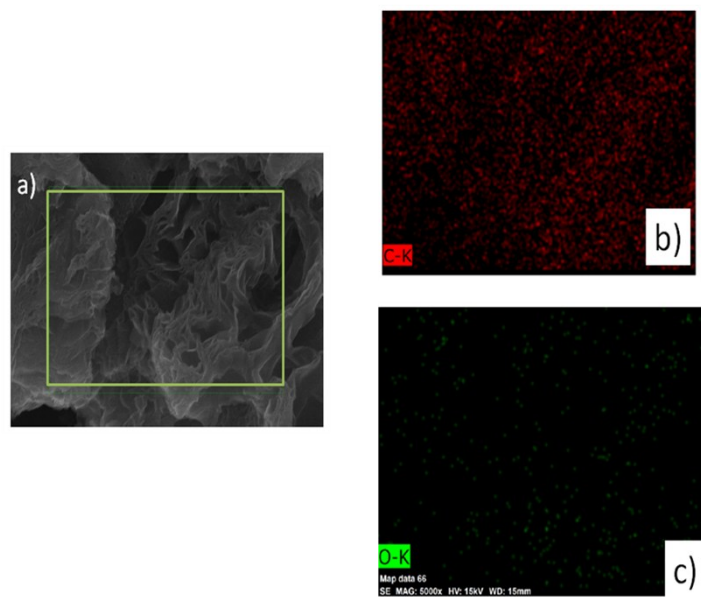

Figure 15: a) FESEM image of RGO<sub>3</sub> and (b & c) elemental mapping of Carbon (Red dots) and Oxygen (Green dots)

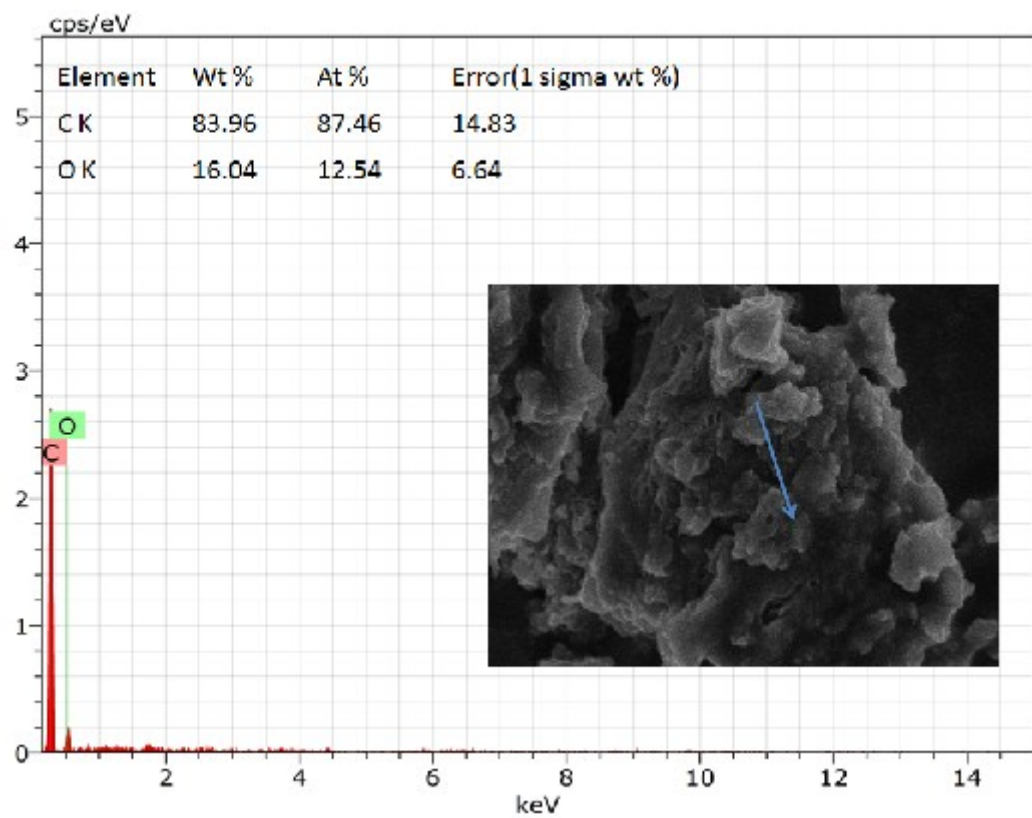

Figure 16: Energy dispersive spectra (EDX) of RGO<sub>3</sub>
